# Supplementary material
Source: HighWire-hosted journal article supplement (https://tsaco.smart01.highwire.org/content/9/1/e001282)
Supplement: inline-supplementary-material-1 [file inline-supplementary-material-1.pdf]

**Supplementary Table 1.** Incidence (%) of postoperative bleed within 24h, by aspirin use, timing of VTE chemoprophylaxis, and sex

| Population      | Overall | Preoperative initiation | Initiation within 12h postoperative | Initiation >12h postoperative | p value |
|-----------------|---------|-------------------------|-------------------------------------|-------------------------------|---------|
| Aspirin users   |         |                         |                                     |                               |         |
| Overall (n=206) | 13.59%  | 11.94%                  | 9.38%                               | 15.89%                        | 0.57    |
| Females (n=135) | 17.78%  | 17.95%                  | 9.52%                               | 20.00%                        | 0.54    |
| Males (n=71)    | 5.63%   | 3.57%                   | 9.09%                               | 6.25%                         | 0.78    |
| No aspirin use  |         |                         |                                     |                               |         |
| Overall (n=658) | 7.29%   | 10.31%                  | 3.39%                               | 6.94%                         | 0.07    |
| Females (n=366) | 7.38%   | 8.85%                   | 2.99%                               | 8.06%                         | 0.30    |
| Males (n=292)   | 7.19%   | 12.35%                  | 3.92%                               | 5.63%                         | 0.10    |
